# Supplementary material for: Risk of Adverse Drug Events Following the Virtual Addition of COVID-19 Repurposed Drugs to Drug Regimens of Frail Older Adults with Polypharmacy
Source: PubMed Central journal article supplement (PMC7463624; doi:10.3390/jcm9082591), 2020-08-10
Supplement: jcm-09-02591-s001.pdf [file jcm-09-02591-s001.pdf]

**Table S1.** The top 25 prescribed medications.

| <b>Medication Name</b> | <b>Number of patients (N)</b> | <b>Prevalence (%)</b> |
|------------------------|-------------------------------|-----------------------|
| Cholecalciferol        | 6,776                         | 54%                   |
| ASA                    | 5,283                         | 42%                   |
| Atorvastatin           | 4,135                         | 33%                   |
| Acetaminophen          | 3,507                         | 28%                   |
| Amlodipine             | 3,231                         | 26%                   |
| Docusate sodium        | 3,217                         | 25%                   |
| Metoprolol             | 3,062                         | 24%                   |
| Lisinopril             | 2,847                         | 22%                   |
| Gabapentin             | 2,810                         | 22%                   |
| Thyroxine              | 2,642                         | 21%                   |
| Furosemide             | 2,629                         | 21%                   |
| Pantoprazole           | 2,402                         | 19%                   |
| Sennosides             | 2,396                         | 19%                   |
| Metformin              | 2,263                         | 18%                   |
| Vitamin B12            | 1,811                         | 14%                   |
| Fluticasone            | 1,727                         | 13%                   |
| Losartan               | 1,726                         | 13%                   |
| Calcium carbonate      | 1,709                         | 13%                   |
| Melatonin              | 1,591                         | 12%                   |
| Sertraline             | 1,583                         | 12%                   |
| Potassium chloride     | 1,521                         | 12%                   |
| Trazodone              | 1,479                         | 11%                   |
| Famotidine             | 1,422                         | 11%                   |
| Omeprazole             | 1,395                         | 11%                   |
| Hydrochlorothiazide    | 1,359                         | 10%                   |

**Table S2.** The most common diseases.

| Disease name category                                                                                                                                                                                                                                                                              | ICD10 code    | Number of patients (N) | Prevalence (%) |
|----------------------------------------------------------------------------------------------------------------------------------------------------------------------------------------------------------------------------------------------------------------------------------------------------|---------------|------------------------|----------------|
| Essential hypertension                                                                                                                                                                                                                                                                             | I10           | 4567                   | 36%            |
| Hyperlipidemia                                                                                                                                                                                                                                                                                     | E78           | 4200                   | 34%            |
| Pain<br>(acute pain due to trauma; other chronic pain; chronic pain syndrome; unspecified; pain hip or knee)                                                                                                                                                                                       | G89, R52, M25 | 4178                   | 33%            |
| Vitamin D deficiency                                                                                                                                                                                                                                                                               | E55           | 3778                   | 30%            |
| Constipation<br>(slow transit constipation; drug induced constipation)                                                                                                                                                                                                                             | K59           | 3759                   | 30%            |
| Type 2 diabetes mellitus<br>(T2D; T2D with diabetic nephropathy; T2D with hyperglycemia; T2D with other specified complication; T2D with unspecified complications)                                                                                                                                | E11           | 3549                   | 28%            |
| Gastro-esophageal reflux disease (GERD)                                                                                                                                                                                                                                                            | K21           | 2942                   | 23%            |
| Depression<br>(major depressive disorder, recurrent, moderate; recurrent severe without psychotic features; recurrent, in full remission; single episode, moderate; single episode, severe with psychotic features; single episode, in partial remission; single episode unspecified)              | F33, F32      | 2405                   | 19%            |
| Rhinitis<br>(vasomotor rhinitis; other seasonal allergic rhinitis)                                                                                                                                                                                                                                 | J30           | 2036                   | 16%            |
| Chronic obstructive pulmonary disease (COPD)<br>(with exacerbation; unspecified)                                                                                                                                                                                                                   | J44           | 1800                   | 14%            |
| Insomnia                                                                                                                                                                                                                                                                                           | G47           | 1587                   | 12%            |
| Hypothyroidism                                                                                                                                                                                                                                                                                     | E03           | 1521                   | 12%            |
| Anxiety<br>(panic disorder; episodic paroxysmal anxiety; generalized anxiety disorder)                                                                                                                                                                                                             | F41           | 1365                   | 11%            |
| Dry eye syndrome                                                                                                                                                                                                                                                                                   | H04           | 1361                   | 10%            |
| Coronary heart disease<br>(atherosclerotic heart disease of coronary artery without angina pectoris; ischemic cardiomyopathy; atherosclerosis of coronary artery bypass graft(s) without angina pectoris; chronic total occlusion of coronary artery; chronic ischemic heart disease, unspecified) | I25           | 1328                   | 10%            |
| Heart failure<br>(left ventricular failure, unspecified; chronic systolic congestive heart failure; combined systolic congestive and diastolic congestive heart failure)                                                                                                                           | I50           | 1141                   | 9%             |
| Radiculopathy<br>(site unspecified; thoracic region; low back pain; other dorsalgia)                                                                                                                                                                                                               | M54           | 1001                   | 8%             |
| Atrial fibrillation                                                                                                                                                                                                                                                                                | I48           | 986                    | 8%             |
| Glaucoma                                                                                                                                                                                                                                                                                           | H40           | 982                    | 8%             |
| Osteoporosis<br>(age-related without current pathological fracture)                                                                                                                                                                                                                                | M81           | 912                    | 7%             |
| Asthma                                                                                                                                                                                                                                                                                             | J45           | 785                    | 6%             |
| Benign prostatic hyperplasia                                                                                                                                                                                                                                                                       | N40           | 767                    | 6%             |

**Table S3.** Concomitant CYP2C8 interacting drugs including CYP2C8 inhibitors, CYP2C8 inducers and potential interacting CYP2C8 competitive substrates with HCQ or CQ.

| CYP2C8 drug names | Number of patients, N (%) |
|-------------------|---------------------------|
| Ibuprofen         | 224 (1.8%)                |
| Loperamide        | 154 (1.2%)                |
| Trimethoprim      | 138 (1.1%)                |
| Pioglitazone      | 109 (0.9%)                |
| Primidone         | 102 (0.8%)                |
| Repaglinide       | 43 (0.4%)                 |
| Phenobarbital     | 35 (0.3%)                 |
| Gemfibrozil       | 32 (0.3%)                 |
| Teriflunomide     | 5 (0.3%)                  |
| Zafirlukast       | 5 (0.04%)                 |
| Abiraterone       | 3 (0.02%)                 |
| Rifampicin        | 1 (0.01%)                 |

**Table S4.** The medication risk factor scores for each factor for the population under study at baseline and following the addition of COVID-19 repurposed drugs.

| Drug Name                                                     | Mean (SD) | Median | <i>p</i> -values * |
|---------------------------------------------------------------|-----------|--------|--------------------|
| FDA Adverse Event Reporting System (FAERS) score <sup>†</sup> |           |        |                    |
| Baseline                                                      | 3.3 (0.9) | 3      |                    |
| HCQ                                                           | 3.5 (0.8) | 4      | <0.0001            |
| HCQ + AZ                                                      | 3.6 (0.7) | 4      | <0.0001            |
| CQ                                                            | 3.5 (0.8) | 4      | <0.0001            |
| CQ + AZ                                                       | 3.7 (0.7) | 4      | <0.0001            |
| LPV/r                                                         | 3.7 (0.7) | 4      | <0.0001            |
| CYP450 drug interaction burden score                          |           |        |                    |
| Baseline                                                      | 4.5 (3.2) | 5      |                    |
| HCQ                                                           | 6.1 (2.9) | 6      | <0.0001            |
| HCQ + AZ                                                      | 6.1 (2.9) | 6      | <0.0001            |
| CQ                                                            | 5.5 (3.2) | 5      | <0.0001            |
| CQ + AZ                                                       | 5.5 (3.2) | 5      | <0.0001            |
| LPV/r                                                         | 9.6 (3.2) | 10     | <0.0001            |
| Anticholinergic burden score                                  |           |        |                    |
| Baseline                                                      | 2.0 (1.8) | 1      |                    |
| HCQ                                                           | 2.0 (1.8) | 1      | 0.97               |
| HCQ + AZ                                                      | 2.0 (1.8) | 1      | 0.97               |
| CQ                                                            | 2.0 (1.8) | 1      | 0.97               |
| CQ + AZ                                                       | 2.0 (1.8) | 1      | 0.97               |
| LPV/r                                                         | 2.0 (1.8) | 1      | 0.97               |
| Sedative burden score                                         |           |        |                    |
| Baseline                                                      | 2.8 (1.3) | 3      |                    |
| HCQ                                                           | 2.8 (1.3) | 3      | 0.94               |
| HCQ + AZ                                                      | 2.8 (1.3) | 3      | 0.94               |
| CQ                                                            | 2.8 (1.3) | 3      | 0.94               |
| CQ + AZ                                                       | 2.8 (1.3) | 3      | 0.94               |
| LPV/r                                                         | 2.8 (1.3) | 3      | 0.94               |
| LQTS score                                                    |           |        |                    |

|                  |           |   |         |
|------------------|-----------|---|---------|
| Baseline         | 1.7 (2.5) | 0 |         |
| HCQ              | 2.8 (3.0) | 2 | <0.0001 |
| HCQ + AZ         | 4.4 (3.0) | 7 | <0.0001 |
| CQ               | 2.8 (3.0) | 2 | <0.0001 |
| CQ + AZ          | 4.4 (2.9) | 7 | <0.0001 |
| LPV/r            | 3.0 (3.0) | 2 | <0.0001 |
| Fexofenadine     | 1.7 (2.5) | 0 | 1.0     |
| Terfenadine      | 3.1 (3.0) | 2 | <0.0001 |
| Terfenadine + AZ | 4.5 (2.9) | 7 | <0.0001 |

\* *p*-values. Wilcoxon signed-rank test analysis was used to compare composite individual risk score before and after addition of repurposed drugs for each participant. † The FAERS score uses the FDA Adverse Event Reporting System to compute risk of adverse drug events (ADE) which is based on computation of a drug regimen relative odds ratio for ADE using the FDA pharmacovigilance database. AZ, azithromycin; CQ, chloroquine; HCQ, hydroxychloroquine; LPV/r, lopinavir boosted with ritonavir; MRS<sup>TM</sup>, medication risk score; SD, standard deviation.
